# Supplementary material for: Controlled Mycobacterium tuberculosis infection in mice under treatment with anti-IL-17A or IL-17F antibodies, in contrast to TNFα neutralization
Source: PubMed Central journal article supplement (PMC5113257; doi:10.1038/srep36923), 2016-11-17
Supplement: srep36923-s1.pdf [file srep36923-s1.pdf]

## SUPPLEMENTARY Figures and Tables

### **Controlled *Mycobacterium tuberculosis* infection in mice under treatment with anti-IL-17A or IL-17F antibodies, in contrast to TNF $\alpha$ neutralization**

Noria Segueni <sup>1,2,°</sup>, Elaine Tritto <sup>3,°</sup>, Marie-Laure Bourigault <sup>1,2</sup>, Stéphanie Rose <sup>1,2</sup>, François Erard <sup>1,2</sup>, Marc Le Bert <sup>1,2</sup>, Muazzam Jacobs <sup>4,5</sup>, Franco Di Padova <sup>3</sup>, Daniel P. Stiehl <sup>3</sup>, Pierre Moulin <sup>3</sup>, Dominique Brees <sup>3</sup>, Salah-Dine Chibout <sup>3</sup>, Bernhard Ryffel <sup>1,2,4,\*</sup>, Michael Kammüller <sup>3,\*</sup> and Valerie F. Quesniaux <sup>1,2,\*</sup>

<sup>1</sup> CNRS, UMR7355, Orleans, France

<sup>2</sup> University of Orleans, INEM, Experimental and Molecular Immunology and Neurogenetics, Orleans, France

<sup>3</sup> Novartis Institutes for Biomedical Research, CH-4002, Basel, Switzerland

<sup>4</sup> Division of Immunology, Institute of Infectious Disease and Molecular Medicine, Health Sciences Faculty, University of Cape Town, South Africa

<sup>5</sup> National Health Laboratory Service, Cape Town, South Africa

°\* contributed equally to this work

Corresponding authors:

Valerie Quesniaux\*

INEM UMR7355, 3B rue de la Ferrollerie, 45071 Orleans, France

Tel : +33 2 38 25 54 39; Fax : +33 2 38 25 79 79;

e-mail: [quesniaux@cnrs-orleans.fr](mailto:quesniaux@cnrs-orleans.fr)

Michael Kammüller\*

Novartis Institutes for Biomedical Research, Klybeckstrasse 141, CH-4057, Basel, Switzerland;

e-mail: [michael.kammuller@novartis.com](mailto:michael.kammuller@novartis.com)

**Supplementary Figures S1 – S7**

**Supplementary Tables S1 – S8**

## Supplementary Figure 1

A. Comparison of anti-IL-17A, anti-IL17F, anti-TNF $\alpha$  antibody treatment and TNF $\alpha$ -deficient mice in acute *M. tuberculosis* model

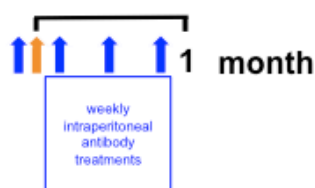

B. Comparison of anti-IL-17A antibody treatment and TNF $\alpha$ -deficient mice in *M. tuberculosis* reactivation model

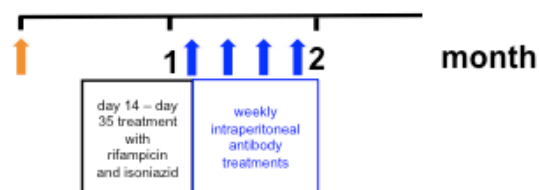

C. Comparison of IL-17RA-, IL-22-, IL-17RA-IL-22- and TNF $\alpha$ -deficient mice in chronic *M. tuberculosis* model

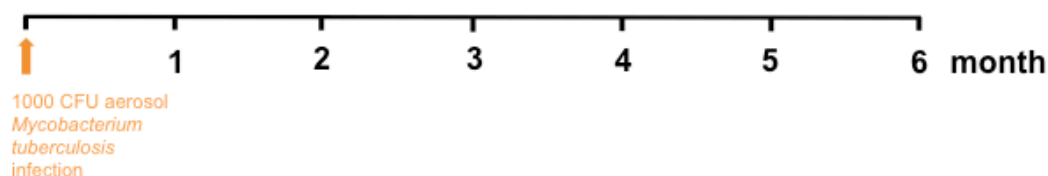

**Supplementary Fig. S1. Schematic overview of utilized *M. tuberculosis* H37Rv strain infection models.** (A) Comparison of anti-IL-17A, anti-IL17F, anti-TNF $\alpha$  antibody treatment and TNF $\alpha$ -deficient mice in early phase *M. tuberculosis* model. (B) Comparison of anti-IL-17A antibody treatment and TNF $\alpha$ -deficient mice in *M. tuberculosis* reactivation model. (C) Comparison of IL-17RA-, IL-22-, IL-17RA-IL-22- and TNF $\alpha$ -deficient mice in early and late phase *M. tuberculosis* model.

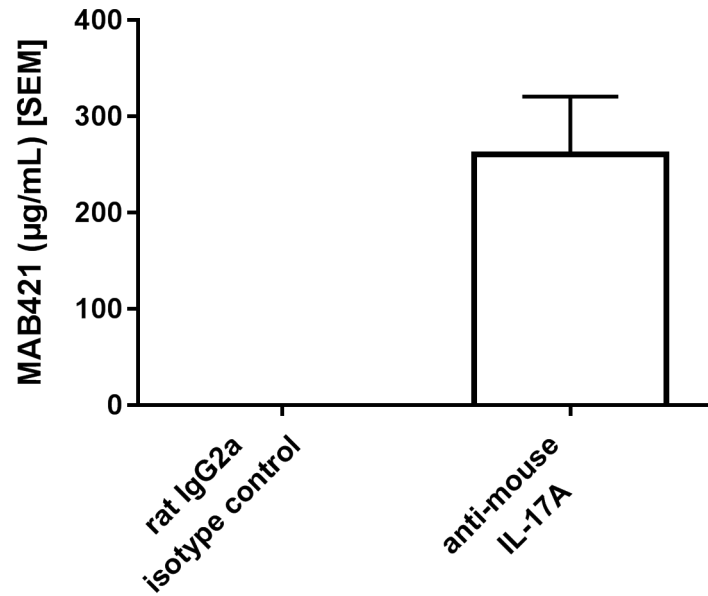

**Supplementary Fig. S2. Plasma levels of anti-IL-17A antibody levels in anti-IL-17A antibody- and isotype control-treated mice at day 28 of treatment (n=10).** *M. tuberculosis* infected C57BL/6 mice (H37Rv, 1000 CFU i.n.) were treated once per week with anti-mouse IL-17A antibody 500 µg per mouse (20 mg/kg i.p.), and isotype control antibody, starting 1 day before the infection.

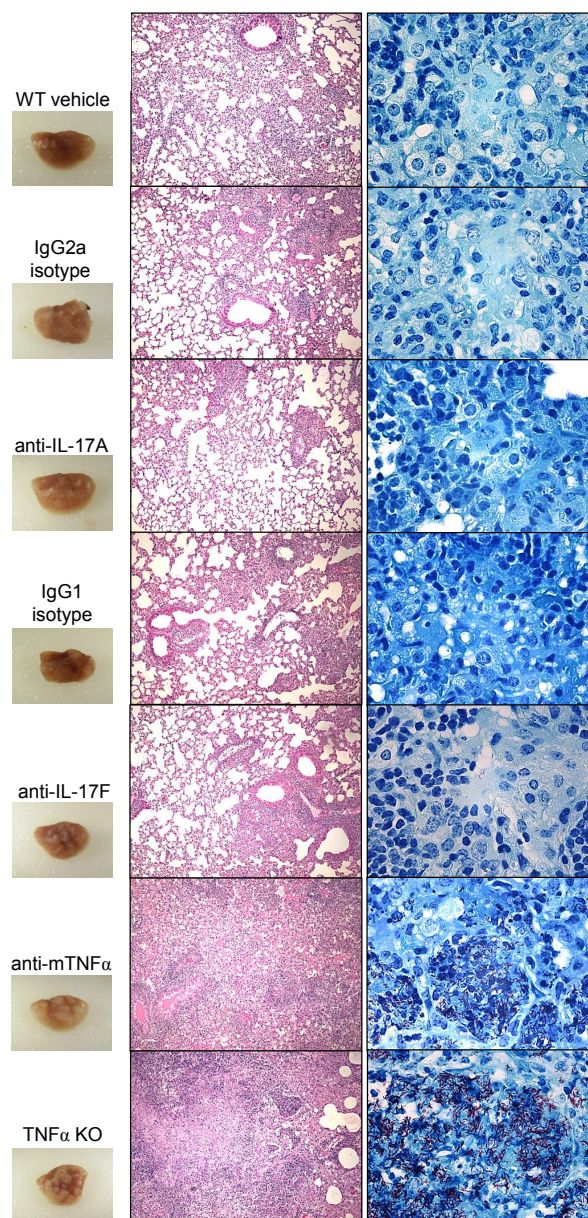

**Supplementary Fig. S3. Neutralizing IL-17A or IL-17F does not compromise host response to early phase of *M. tuberculosis* infection, in contrast to TNF $\alpha$  neutralization.** *M. tuberculosis* infected C57BL/6 mice (H37Rv, 1000 CFU i.n.) were treated once per week with anti-mouse IL-17A or IL-17F antibodies (20 mg/kg i.p.), anti-mouse TNF $\alpha$  antibody (10 mg/kg), respective isotype control antibodies, or vehicle, starting 1 day before the infection, and monitored for body weight. Lung pathology was assessed on day 28. Lungs of TNF $\alpha$ -deficient mice with large, confluent nodules are included for comparison. Microscopic examination showing extensive inflammation and necrosis in lungs of infected TNF $\alpha$ -deficient mice or anti-TNF $\alpha$  antibody treated mice (Left: haematoxylin and eosin, magnification x 50) as well as numerous acid-fast bacilli (Right: Ziehl-Nielson, magnification x 1000).

**A Chemokine and cytokine responses**

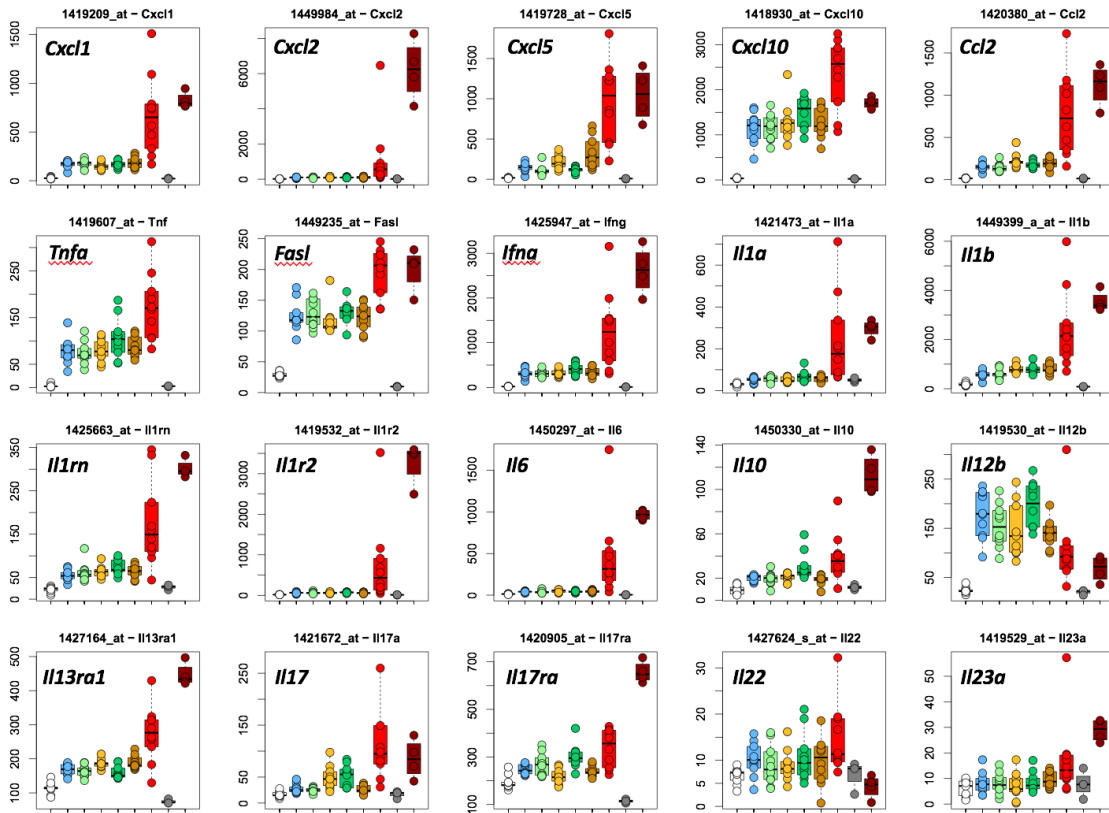

**B Host-pathogen interactions, antimycobacterial activity, and modulatory responses**

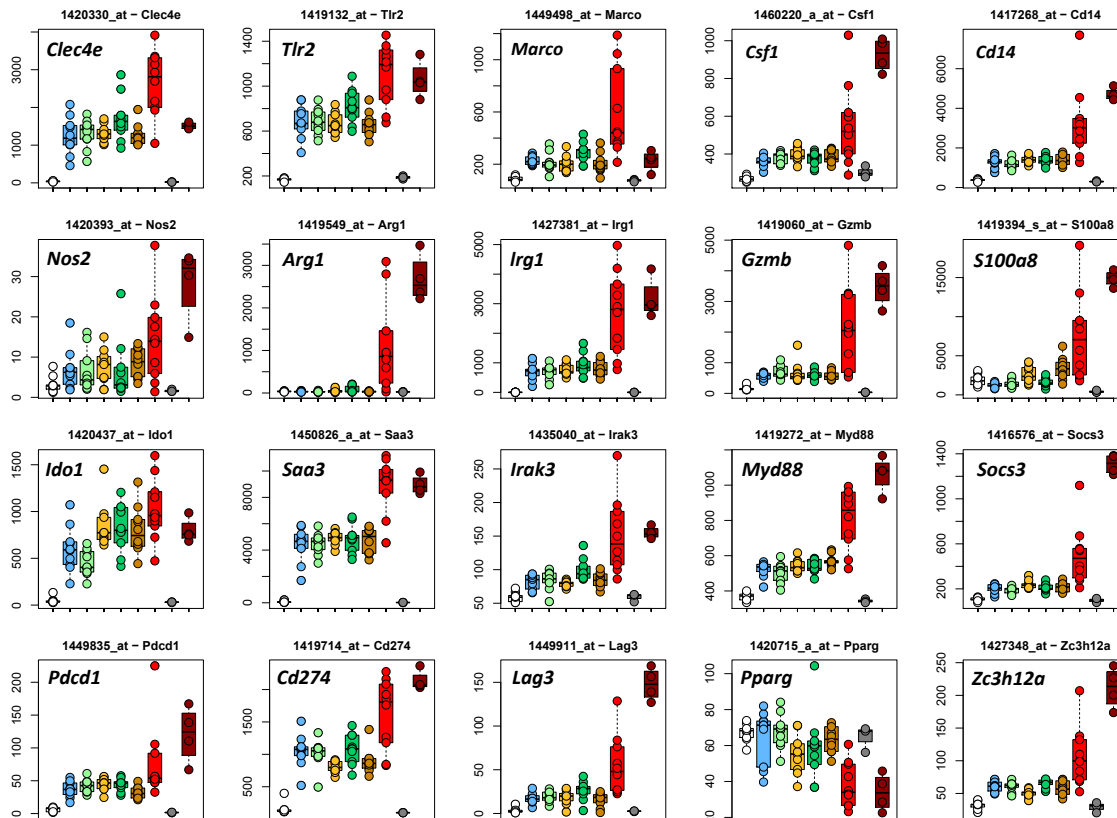

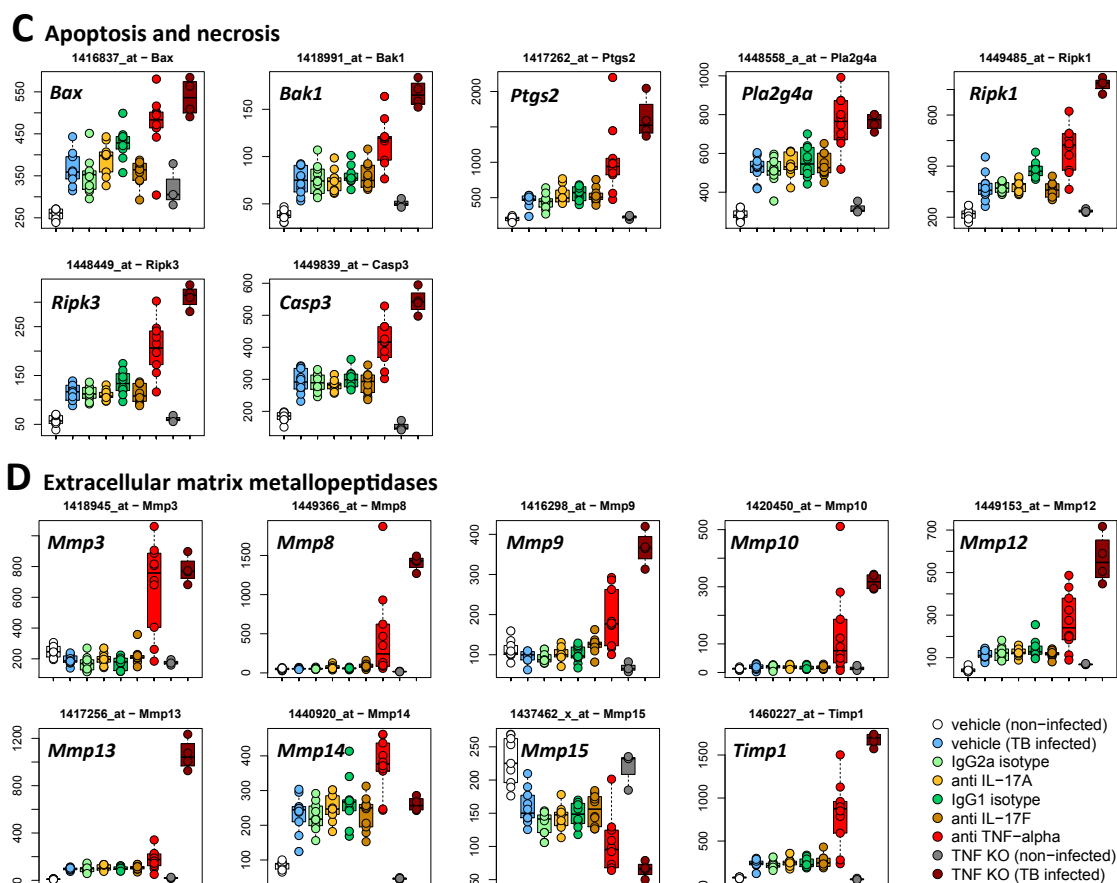

**Supplementary Fig. S4. TNF $\alpha$  neutralization exacerbates gene expression of inflammatory markers in early phase of *M. tuberculosis* infection, in contrast to anti-IL-17A or anti-IL-17F treatment.** Transcriptional profiling of lungs from *M. tuberculosis* infected C57BL/6 mice (H37Rv, 1000 CFU i.n.) treated once per week with anti-mouse IL-17A or IL-17F antibodies (20 mg/kg i.p.), anti-mouse TNF $\alpha$  antibody (10 mg/kg i.p.), respective isotype control antibodies, or vehicle, starting 1 day before the infection, and from non-infected C57BL/6 mice treated with vehicle or from *M. tuberculosis* infected and non-infected TNF $\alpha$ -deficient mice was performed on day 28 to assess molecular changes in the different conditions. Boxplots for selected genes showing the MAS5 normalized expression level for each individual animal, the lower and upper quartiles and the median for the group.

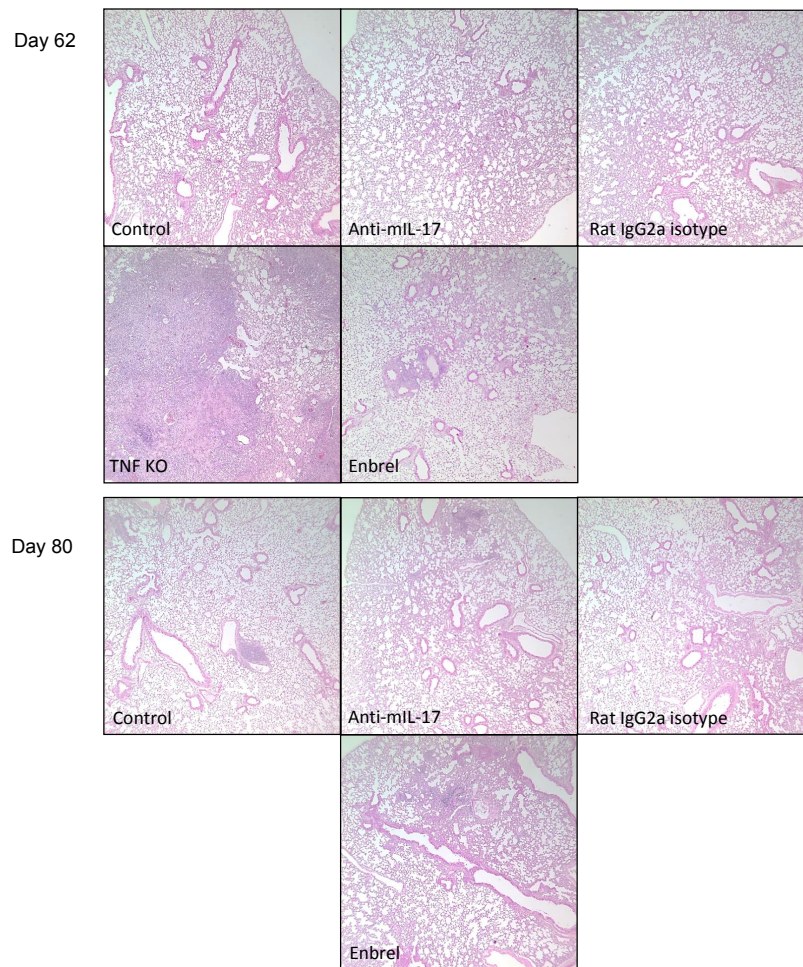

**Supplementary Fig. S5. Neutralizing IL-17A does not compromise host response to *M. tuberculosis* infection in a murine reactivation model.** Two weeks following *M. tuberculosis* infection of C57BL/6 mice or TNF $\alpha$ -deficient mice (H37Rv, 1000 CFU i.n.), mice were subsequently treated for 3 weeks with isoniazid (INH) and rifampicin (RIF) to control the infection. At 5 weeks, mice were injected i.p. weekly with an IL-17A neutralizing antibody (IgG2a; MAB421 R&D), or the respective isotype control antibody (MAB006 R&D; all 1 mg/mouse) or with Enbrel (30 mg/kg) for 4 weeks. Lung pathology was assessed on day 62 and 80. Microscopic examination showing extensive inflammation and necrosis in infected TNF $\alpha$ -deficient lungs with large confluent nodules on day 72 are included for comparison (haematoxylin and eosin, magnification x 50).



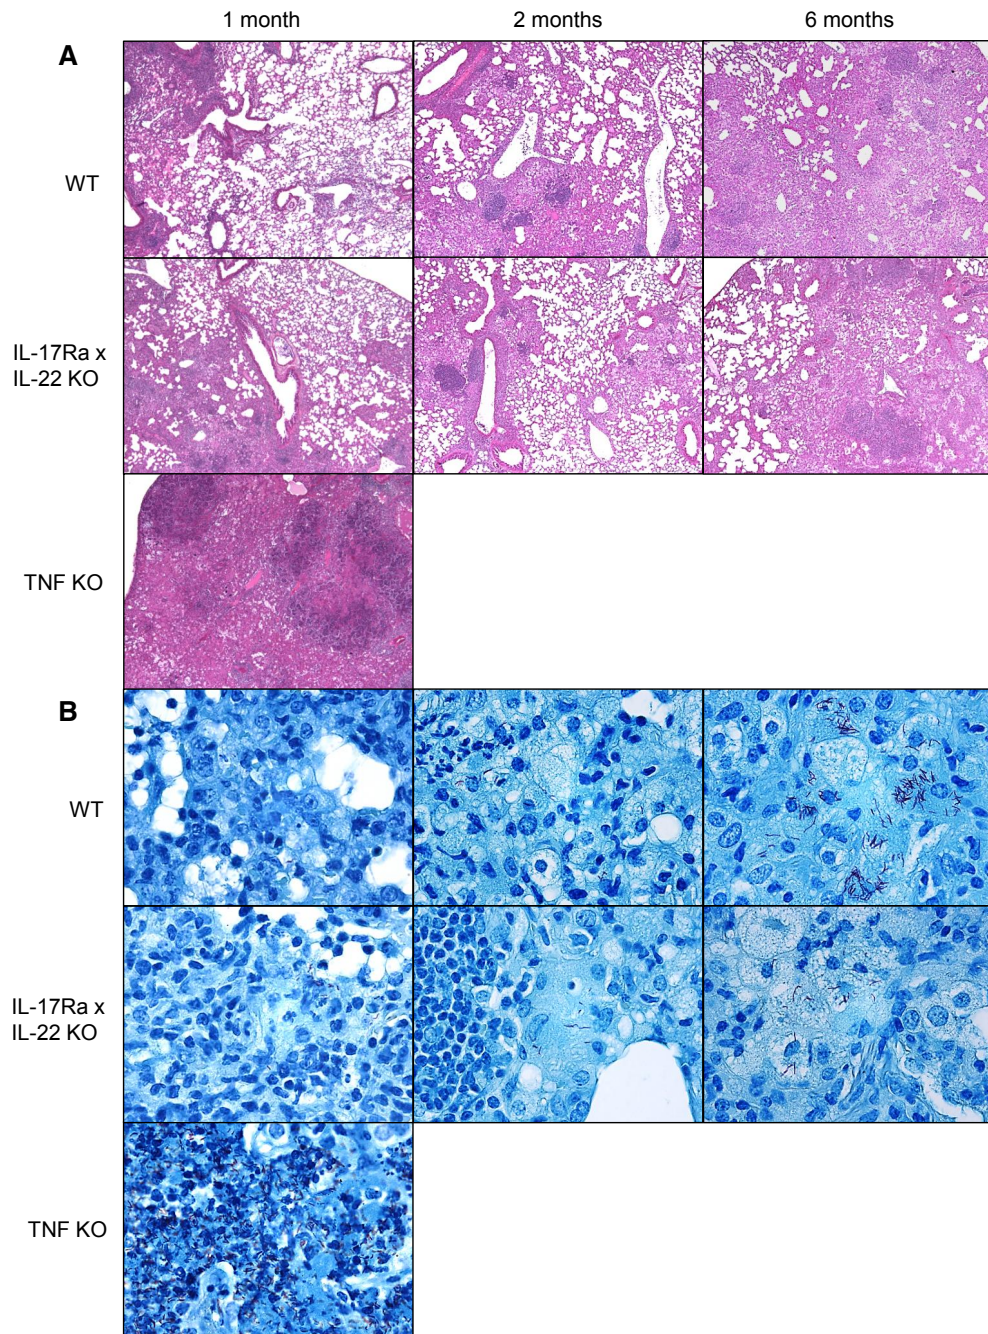

**Supplementary Fig. S6. Contained chronic *M. tuberculosis* infection in the absence of IL-17RA and/or IL-22 pathways.** Mice deficient for IL-17RA, IL-22, both IL-17RA and IL-22, and TNF $\alpha$  mice as well as wild-type mice were infected with *M. tuberculosis* (H37Rv, 1000 CFU/mouse i.n.). Lung pathology was assessed at 1, 2, and 6 months. Macroscopically large, confluent nodules were visible in all groups. Microscopic examination showed extensive inflammation with limited free alveolar space (A, haematoxylin and eosin, magnification x 50), with the presence of acid-fast bacilli (B, Ziehl-Nielson, magnification x 1000).

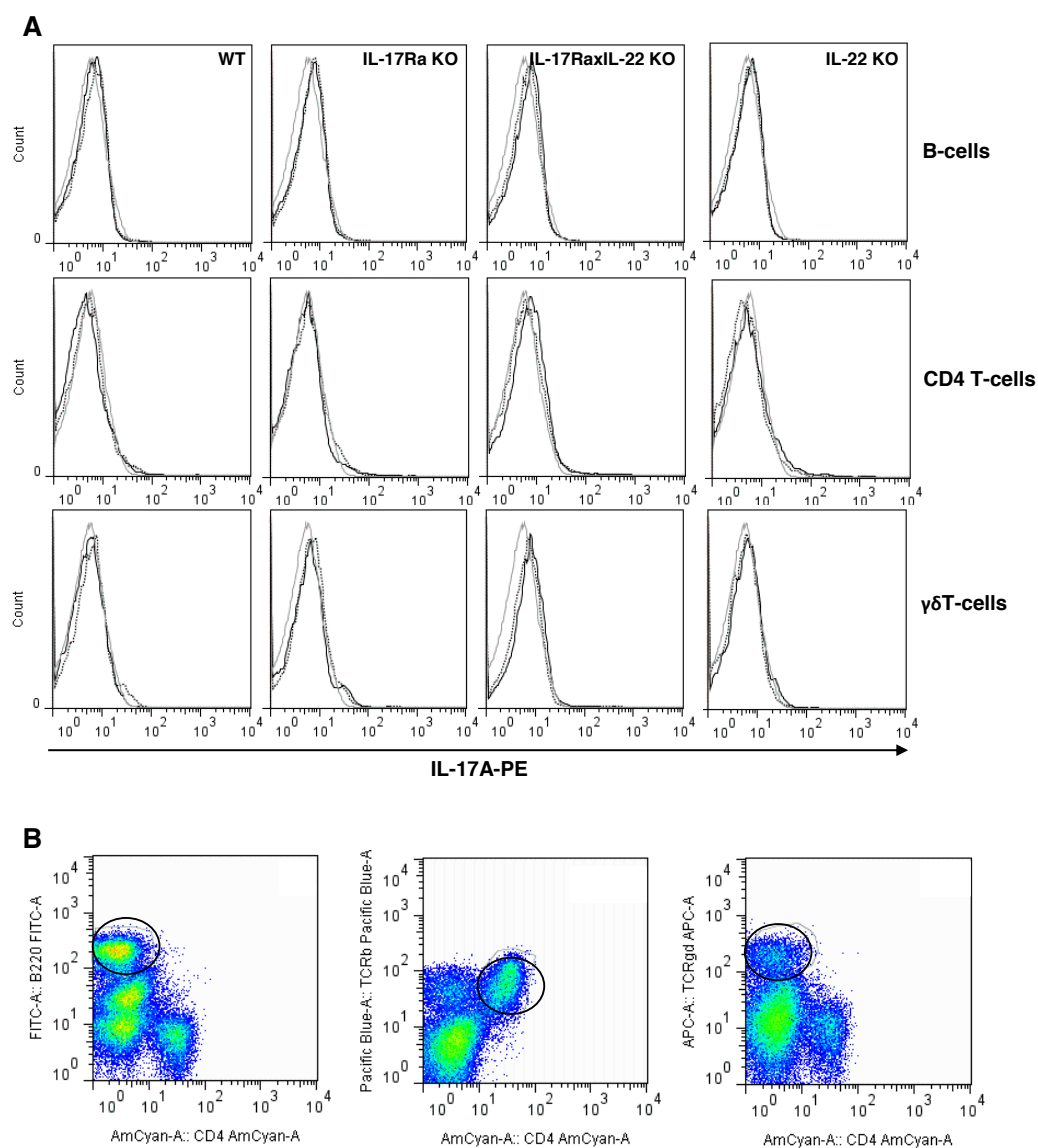

**Supplementary Fig. S7. IL-17A expression by CD4<sup>+</sup> T-cells and  $\gamma\delta$ T cells in the absence of IL-17RA and IL-22.** Lung infiltrating cells from mice deficient for IL-17RA and/or IL-22 and wild-type mice exposed to *M. tuberculosis* (1000 CFU/mouse i.n.) were analysed by flow cytometry at 2 months post-infection. Intracellular staining for IL-17A is shown for B220<sup>+</sup>CD4<sup>-</sup> B cells, CD4<sup>+</sup>TCR $\beta$ <sup>+</sup> T-cells and TCR $\gamma\delta$ <sup>+</sup>CD4<sup>-</sup>  $\gamma\delta$ T-cells, as indicated (A). Representative histograms are shown for 2 individual mice per group with isotype controls in light grey. (B) Representative dot plots are shown to illustrate the gating strategy.

**Supplementary Table 1 CD4<sup>+</sup> T cells transcriptomic signature**

| ProbeSet     | GeneSymbol                    | GeneName                                                                                                             |
|--------------|-------------------------------|----------------------------------------------------------------------------------------------------------------------|
| 1423135_at   | Thy1                          | thymus cell antigen 1, theta                                                                                         |
| 1452405_x_at | Trav9d-3                      | T cell receptor alpha variable 9D-3                                                                                  |
| 1425570_at   | Slamf1                        | signaling lymphocytic activation molecule family member 1                                                            |
| 1421930_at   | Icos                          | inducible T cell co-stimulator                                                                                       |
| 1426168_a_at | Trav9d-3                      | T cell receptor alpha variable 9D-3                                                                                  |
| 1426159_x_at | Tcrb-J                        | T cell receptor beta, joining region                                                                                 |
| 1440178_x_at | Zap70                         | zeta-chain (TCR) associated protein kinase                                                                           |
| 1426396_at   | Cd247                         | CD247 antigen                                                                                                        |
| 1448576_at   | Il7r                          | interleukin 7 receptor                                                                                               |
| 1448575_at   | Il7r                          | interleukin 7 receptor                                                                                               |
| 1421931_at   | Icos                          | inducible T cell co-stimulator                                                                                       |
| 1426772_x_at | Tcrb-J                        | T cell receptor beta, joining region                                                                                 |
| 1420819_at   | Sla                           | src-like adaptor                                                                                                     |
| 1445068_at   | Malt1                         | mucosa associated lymphoid tissue lymphoma translocation gene 1                                                      |
| 1448167_at   | Ifngr1                        | interferon gamma receptor 1                                                                                          |
| 1422231_a_at | Tnfrsf25                      | tumor necrosis factor receptor superfamily, member 25                                                                |
| 1426044_a_at | Prkcq                         | protein kinase C, theta                                                                                              |
| 1423760_at   | Cd44                          | CD44 antigen                                                                                                         |
| 1448759_at   | Il2rb                         | interleukin 2 receptor, beta chain                                                                                   |
| 1452539_a_at | Cd247                         | CD247 antigen                                                                                                        |
| 1420659_at   | Slamf6                        | SLAM family member 6                                                                                                 |
| 1422105_at   | Cd3e                          | CD3 antigen, epsilon polypeptide                                                                                     |
| 1419714_at   | Cd274                         | CD274 antigen                                                                                                        |
| 1456126_at   | Malt1                         | mucosa associated lymphoid tissue lymphoma translocation gene 1                                                      |
| 1425226_x_at | LOC665506                     | T-cell receptor beta-2 chain C region-like                                                                           |
| 1418971_x_at | Bcl10                         | B cell leukemia/lymphoma 10                                                                                          |
| 1437025_at   | Cd28                          | CD28 antigen                                                                                                         |
| 1456429_at   | Malt1                         | mucosa associated lymphoid tissue lymphoma translocation gene 1                                                      |
| 1460651_at   | Lat                           | linker for activation of T cells                                                                                     |
| 1418770_at   | Cd2                           | CD2 antigen                                                                                                          |
| 1425854_x_at | LOC665506                     | T-cell receptor beta-2 chain C region-like                                                                           |
| 1427532_at   | Trat1                         | T cell receptor associated transmembrane adaptor 1                                                                   |
| 1452205_x_at | LOC665506 :<br>Tcrb-J : Trbv1 | T-cell receptor beta-2 chain C region-like : T cell receptor beta, joining region : T cell receptor beta, variable 1 |
| 1439205_at   | Nfatc2                        | nuclear factor of activated T cells, cytoplasmic, calcineurin dependent 2                                            |
| 1427184_at   | Tcrb-J                        | T cell receptor beta, joining region                                                                                 |
| 1436312_at   | Ikzf1                         | IKAROS family zinc finger 1                                                                                          |

| ProbeSet     | GeneSymbol | GeneName     |
|--------------|------------|--------------|
| 1451910_a_at | Cd6        | CD6 antigen  |
| 1417597_at   | Cd28       | CD28 antigen |

**Supplementary Table 2 CD8<sup>+</sup> T cells transcriptomic signature**

| ProbeSet     | GeneSymbol | GeneName                                                |
|--------------|------------|---------------------------------------------------------|
| 1435560_at   | Itgal      | integrin alpha L                                        |
| 1425832_a_at | Cxcr6      | chemokine (C-X-C motif) receptor 6                      |
| 1457917_at   | Lck        | lymphocyte protein tyrosine kinase                      |
| 1416296_at   | Il2rg      | interleukin 2 receptor, gamma chain                     |
| 1445399_at   | Klrb1b     | killer cell lectin-like receptor subfamily B member 1B  |
| 1435227_at   | Bcl11b     | B cell leukemia/lymphoma 11B                            |
| 1417869_s_at | Ctsz       | cathepsin Z                                             |
| 1456836_at   | Itk        | IL2 inducible T cell kinase                             |
| 1426169_a_at | Lat2       | linker for activation of T cells family, member 2       |
| 1417868_a_at | Ctsz       | cathepsin Z                                             |
| 1417870_x_at | Ctsz       | cathepsin Z                                             |
| 1426170_a_at | Cd8b1      | CD8 antigen, beta chain 1                               |
| 1451673_at   | Cd8a       | CD8 antigen, alpha chain                                |
| 1425084_at   | Gimap7     | GTPase, IMAP family member 7                            |
| 1416295_a_at | Il2rg      | interleukin 2 receptor, gamma chain                     |
| 1420421_s_at | Klrb1b     | killer cell lectin-like receptor subfamily B member 1B  |
| 1440811_x_at | Cd8a       | CD8 antigen, alpha chain                                |
| 1428735_at   | Cd69       | CD69 antigen                                            |
| 1444078_at   | Cd8a       | CD8 antigen, alpha chain                                |
| 1446476_at   | Trav12n-2  | T cell receptor alpha variable 12N-2                    |
| 1460245_at   | Klrd1      | killer cell lectin-like receptor, subfamily D, member 1 |
| 1422632_at   | Ctsw       | cathepsin W                                             |
| 1444283_at   | Gimap7     | GTPase, IMAP family member 7                            |
| 1437542_at   | Ikzf2      | IKAROS family zinc finger 2                             |
| 1437939_s_at | Ctsc       | cathepsin C                                             |
| 1419226_at   | Cd96       | CD96 antigen                                            |
| 1420404_at   | Cd86       | CD86 antigen                                            |
| 1417171_at   | Itk        | IL2 inducible T cell kinase                             |
| 1424375_s_at | Gimap4     | GTPase, IMAP family member 4                            |
| 1418353_at   | Cd5        | CD5 antigen                                             |
| 1416382_at   | Ctsc       | cathepsin C                                             |
| 1422067_at   | Klrb1b     | killer cell lectin-like receptor subfamily B member 1B  |
| 1425335_at   | Cd8a       | CD8 antigen, alpha chain                                |
| 1422812_at   | Cxcr6      | chemokine (C-X-C motif) receptor 6                      |
| 1448160_at   | Lcp1       | lymphocyte cytosolic protein 1                          |
| 1427667_s_at | Tcrb-J     | T cell receptor beta, joining region                    |
| 1452966_at   | Bcl11b     | B cell leukemia/lymphoma 11B                            |

**Supplementary Table 3**  **$\gamma\delta$ T cells transcriptomic signature**

| ProbeSet     | GeneSymbol                          | GeneName                                                              |
|--------------|-------------------------------------|-----------------------------------------------------------------------|
| 1450521_a_at | Tcr $\gamma$ -V4                    | T cell receptor gamma, variable 4                                     |
| 1422189_x_at | Tcr $\gamma$ -V4                    | T cell receptor gamma, variable 4                                     |
| 1455527_at   | Cd163l1                             | CD163 molecule-like 1                                                 |
| 1427656_at   | Tcr $\beta$ -J                      | T cell receptor beta, joining region                                  |
| 1449835_at   | Pdcd1                               | programmed cell death 1                                               |
| 1423467_at   | Ms4a4b                              | membrane-spanning 4-domains, subfamily A, member 4B                   |
| 1420691_at   | Il2ra                               | interleukin 2 receptor, alpha chain                                   |
| 1440808_x_at | Cd163l1                             | CD163 molecule-like 1                                                 |
| 1422701_at   | Zap70                               | zeta-chain (TCR) associated protein kinase                            |
| 1421672_at   | Il17a                               | interleukin 17A                                                       |
| 1422188_s_at | Tcr $\gamma$ -C1 : Tcr $\gamma$ -C2 | T cell receptor gamma, constant 1 : T-cell receptor gamma, constant 2 |
| 1425396_a_at | Lck                                 | lymphocyte protein tyrosine kinase                                    |
| 1419083_at   | Tnfsf11                             | tumor necrosis factor (ligand) superfamily, member 11                 |
| 1419178_at   | Cd3g                                | CD3 antigen, gamma polypeptide                                        |
| 1417620_at   | Rac2                                | RAS-related C3 botulinum substrate 2                                  |
| 1422828_at   | Cd3d                                | CD3 antigen, delta polypeptide                                        |

**Supplementary Table 4** **NK cells transcriptomic signature**

| ProbeSet     | GeneSymbol | GeneName                                                 |
|--------------|------------|----------------------------------------------------------|
| 1419026_at   | Daxx       | Fas death domain-associated protein                      |
| 1418803_a_at | FasL       | Fas ligand (TNF superfamily, member 6)                   |
| 1452352_at   | Ctla2b     | cytotoxic T lymphocyte-associated protein 2 beta         |
| 1417898_a_at | Gzma       | granzyme A                                               |
| 1449235_at   | FasL       | Fas ligand (TNF superfamily, member 6)                   |
| 1450753_at   | Nkg7       | natural killer cell group 7 sequence                     |
| 1449991_at   | Cd244      | CD244 natural killer cell receptor 2B4                   |
| 1425888_at   | Klra17     | killer cell lectin-like receptor, subfamily A, member 17 |
| 1450495_a_at | Klrk1      | killer cell lectin-like receptor subfamily K, member 1   |
| 1421304_at   | Klra2      | killer cell lectin-like receptor, subfamily A, member 2  |
| 1419060_at   | Gzmb       | granzyme B                                               |
| 1422280_at   | Gzmk       | granzyme K                                               |
| 1419334_at   | Ctla4      | cytotoxic T-lymphocyte-associated protein 4              |
| 1425005_at   | Klrc1      | killer cell lectin-like receptor subfamily C, member 1   |
| 1449131_s_at | Cd1d1      | CD1d1 antigen                                            |
| 1420788_at   | Klrg1      | killer cell lectin-like receptor subfamily G, member 1   |

**Supplementary Table 5** **Macrophage transcriptomic signature**

| ProbeSet     | GeneSymbol    | GeneName                                    |
|--------------|---------------|---------------------------------------------|
| 1449580_s_at | H2-DMb1 : H2- | histocompatibility 2, class II, locus Mb1 : |

| ProbeSet     | GeneSymbol              | GeneName                                                                                              |
|--------------|-------------------------|-------------------------------------------------------------------------------------------------------|
|              | DMb2                    | histocompatibility 2, class II, locus Mb2                                                             |
| 1415983_at   | Lcp1                    | lymphocyte cytosolic protein 1                                                                        |
| 1416952_at   | Atp6v1d                 | ATPase, H+ transporting, lysosomal V1 subunit D                                                       |
| 1417009_at   | C1ra : C1rb             | complement component 1, r subcomponent A : complement component 1, r subcomponent B                   |
| 1425890_at   | Ly6i                    | lymphocyte antigen 6 complex, locus I                                                                 |
| 1425545_x_at | H2-D1 : H2-L            | histocompatibility 2, D region locus 1 : histocompatibility 2, D region locus L                       |
| 1459872_x_at | H2-DMa                  | histocompatibility 2, class II, locus DMa                                                             |
| 1427746_x_at | H2-K1 :<br>LOC101056305 | histocompatibility 2, K1, K region : h-2 class I histocompatibility antigen, K-D alpha chain-like     |
| 1450648_s_at | H2-Ab1                  | histocompatibility 2, class II antigen A, beta 1                                                      |
| 1419128_at   | Itgax                   | integrin alpha X                                                                                      |
| 1449473_s_at | Cd40                    | CD40 antigen                                                                                          |
| 1422962_a_at | Psmb8                   | proteasome (prosome, macropain) subunit, beta type 8 (large multifunctional peptidase 7)              |
| 1451721_a_at | H2-Ab1                  | histocompatibility 2, class II antigen A, beta 1                                                      |
| 1435476_a_at | Fcgr2b                  | Fc receptor, IgG, low affinity IIb                                                                    |
| 1448591_at   | Ctss                    | cathepsin S                                                                                           |
| 1417381_at   | C1qa                    | complement component 1, q subcomponent, alpha polypeptide                                             |
| 1422191_at   | Cd200r1                 | CD200 receptor 1                                                                                      |
| 1419684_at   | Ccl8 :<br>LOC100503254  | chemokine (C-C motif) ligand 8 : c-C motif chemokine 8-like                                           |
| 1419873_s_at | Csf1r                   | colony stimulating factor 1 receptor                                                                  |
| 1416016_at   | Tap1                    | transporter 1, ATP-binding cassette, sub-family B (MDR/TAP)                                           |
| 1453304_s_at | Ly6e                    | lymphocyte antigen 6 complex, locus E                                                                 |
| 1456772_at   | Ncf1                    | neutrophil cytosolic factor 1                                                                         |
| 1448123_s_at | Tgfbi                   | transforming growth factor, beta induced                                                              |
| 1448898_at   | Ccl9                    | chemokine (C-C motif) ligand 9                                                                        |
| 1420699_at   | Clec7a                  | C-type lectin domain family 7, member a                                                               |
| 1438858_x_at | H2-Aa                   | histocompatibility 2, class II antigen A, alpha                                                       |
| 1425519_a_at | Cd74                    | CD74 antigen (invariant polypeptide of major histocompatibility complex, class II antigen-associated) |
| 1454268_a_at | Cyba                    | cytochrome b-245, alpha polypeptide                                                                   |
| 1450792_at   | Tyrobp                  | TYRO protein tyrosine kinase binding protein                                                          |
| 1437726_x_at | C1qb                    | complement component 1, q subcomponent, beta polypeptide                                              |
| 1435290_x_at | H2-Aa                   | histocompatibility 2, class II antigen A, alpha                                                       |
| 1443783_x_at | H2-Aa                   | histocompatibility 2, class II antigen A, alpha                                                       |
| 1422527_at   | H2-DMa                  | histocompatibility 2, class II, locus DMa                                                             |

| ProbeSet     | GeneSymbol        | GeneName                                                                                 |
|--------------|-------------------|------------------------------------------------------------------------------------------|
| 1448632_at   | Psemb10           | proteasome (prosome, macropain) subunit, beta type 10                                    |
| 1436559_a_at | Psmid10           | proteasome (prosome, macropain) 26S subunit, non-ATPase, 10                              |
| 1417490_at   | Ctsb              | cathepsin B                                                                              |
| 1421211_a_at | Ciita             | class II transactivator                                                                  |
| 1425336_x_at | H2-K1             | histocompatibility 2, K1, K region                                                       |
| 1418536_at   | H2-Q7 : H2-Q9     | histocompatibility 2, Q region locus 7 : histocompatibility 2, Q region locus 9          |
| 1418204_s_at | Aif1              | allograft inflammatory factor 1                                                          |
| 1444040_at   | Lair1             | leukocyte-associated Ig-like receptor 1                                                  |
| 1455332_x_at | Fcgr2b            | Fc receptor, IgG, low affinity IIb                                                       |
| 1448732_at   | Ctsb              | cathepsin B                                                                              |
| 1450696_at   | Psemb9            | proteasome (prosome, macropain) subunit, beta type 9 (large multifunctional peptidase 2) |
| 1415871_at   | Tgfbi             | transforming growth factor, beta induced                                                 |
| 1450678_at   | Itgb2             | integrin beta 2                                                                          |
| 1421065_at   | Jak2              | Janus kinase 2                                                                           |
| 1421326_at   | Csf2rb            | colony stimulating factor 2 receptor, beta, low-affinity (granulocyte-macrophage)        |
| 1418021_at   | C4b : LOC675521   | complement component 4B (Chido blood group) : complement C4-B-like                       |
| 1418826_at   | Ms4a6b            | membrane-spanning 4-domains, subfamily A, member 6B                                      |
| 1451462_a_at | Ifnar2            | interferon (alpha and beta) receptor 2                                                   |
| 1449858_at   | Cd86              | CD86 antigen                                                                             |
| 1451784_x_at | H2-D1             | histocompatibility 2, D region locus 1                                                   |
| 1418638_at   | H2-DMb1 : H2-DMb2 | histocompatibility 2, class II, locus Mb1 : histocompatibility 2, class II, locus Mb2    |
| 1448128_at   | Ctsa              | cathepsin A                                                                              |
| 1419482_at   | C3ar1             | complement component 3a receptor 1                                                       |
| 1421813_a_at | Psap              | prosaposin                                                                               |
| 1417025_at   | H2-Eb1            | histocompatibility 2, class II antigen E beta                                            |
| 1419132_at   | Tlr2              | toll-like receptor 2                                                                     |
| 1442082_at   | C3ar1             | complement component 3a receptor 1                                                       |
| 1417936_at   | Ccl9              | chemokine (C-C motif) ligand 9                                                           |
| 1453913_a_at | Tap2              | transporter 2, ATP-binding cassette, sub-family B (MDR/TAP)                              |
| 1460339_at   | Psma4             | proteasome (prosome, macropain) subunit, alpha type 4                                    |
| 1448883_at   | Lgmn              | legumain                                                                                 |
| 1450234_at   | Ms4a6c            | membrane-spanning 4-domains, subfamily A, member 6C                                      |
| 1418465_at   | Ncf4              | neutrophil cytosolic factor 4                                                            |
| 1417063_at   | C1qb              | complement component 1, q subcomponent, beta polypeptide                                 |

| ProbeSet     | GeneSymbol                      | GeneName                                                                                                                                   |
|--------------|---------------------------------|--------------------------------------------------------------------------------------------------------------------------------------------|
| 1451931_x_at | H2-K1                           | histocompatibility 2, K1, K region                                                                                                         |
| 1450378_at   | Tapbp                           | TAP binding protein                                                                                                                        |
| 1449360_at   | Csf2rb2                         | colony stimulating factor 2 receptor, beta 2, low-affinity (granulocyte-macrophage)                                                        |
| 1438629_x_at | Grn                             | granulin                                                                                                                                   |
| 1417721_s_at | Laptm5                          | lysosomal-associated protein transmembrane 5                                                                                               |
| 1417189_at   | Psme2                           | proteasome (prosome, macropain) 28 subunit, beta                                                                                           |
| 1435313_at   | Cd200r4                         | CD200 receptor 4                                                                                                                           |
| 1451941_a_at | Fcgr2b                          | Fc receptor, IgG, low affinity IIb                                                                                                         |
| 1424041_s_at | C1s                             | complement component 1, s subcomponent                                                                                                     |
| 1456250_x_at | Tgfbi                           | transforming growth factor, beta induced                                                                                                   |
| 1436905_x_at | Laptm5                          | lysosomal-associated protein transmembrane 5                                                                                               |
| 1425477_x_at | H2-Ab1                          | histocompatibility 2, class II antigen A, beta 1                                                                                           |
| 1435477_s_at | Fcgr2b                          | Fc receptor, IgG, low affinity IIb                                                                                                         |
| 1449401_at   | C1qc                            | complement component 1, q subcomponent, C chain                                                                                            |
| 1427076_at   | Mpeg1                           | macrophage expressed gene 1                                                                                                                |
| 1417314_at   | C2 : Cfb                        | complement component 2 (within H-2S) : complement factor B                                                                                 |
| 1421210_at   | Ciita                           | class II transactivator                                                                                                                    |
| 1448148_at   | Grn                             | granulin                                                                                                                                   |
| 1424948_x_at | H2-D1 : H2-K1 :<br>LOC101056305 | histocompatibility 2, D region locus 1 : histocompatibility 2, K1, K region : h-2 class I histocompatibility antigen, K-D alpha chain-like |
| 1449164_at   | Cd68                            | CD68 antigen                                                                                                                               |
| 1452431_s_at | H2-Aa                           | histocompatibility 2, class II antigen A, alpha                                                                                            |
| 1456567_x_at | Grn                             | granulin                                                                                                                                   |
| 1455660_at   | Csf2rb                          | colony stimulating factor 2 receptor, beta, low-affinity (granulocyte-macrophage)                                                          |
| 1451544_at   | Tapbpl                          | TAP binding protein-like                                                                                                                   |
| 1421812_at   | Tapbp                           | TAP binding protein                                                                                                                        |
| 1417056_at   | Psme1                           | proteasome (prosome, macropain) 28 subunit, alpha                                                                                          |
| 1460218_at   | Cd52                            | CD52 antigen                                                                                                                               |
| 1423954_at   | C3 :<br>LOC100048759            | complement component 3 : complement C3-like                                                                                                |
| 1448731_at   | Il10ra                          | interleukin 10 receptor, alpha                                                                                                             |
| 1415687_a_at | Psap                            | prosaposin                                                                                                                                 |
| 1418340_at   | Fcer1g                          | Fc receptor, IgE, high affinity I, gamma polypeptide                                                                                       |
| 1451683_x_at | H2-D1                           | histocompatibility 2, D region locus 1                                                                                                     |



**Supplementary Table 6 Monocyte transcriptomic signature**

| ProbeSet     | GeneSymbol        | GeneName                                                                                 |
|--------------|-------------------|------------------------------------------------------------------------------------------|
| 1424067_at   | Icam1             | intercellular adhesion molecule 1                                                        |
| 1427164_at   | Il13ra1           | interleukin 13 receptor, alpha 1                                                         |
| 1416303_at   | Litaf             | LPS-induced TN factor                                                                    |
| 1450297_at   | Il6               | interleukin 6                                                                            |
| 1427736_a_at | Ccr12             | chemokine (C-C motif) receptor-like 2                                                    |
| 1456212_x_at | Socs3             | suppressor of cytokine signaling 3                                                       |
| 1419549_at   | Arg1              | arginase, liver                                                                          |
| 1449731_s_at | Nfkbia            | nuclear factor of kappa light polypeptide gene enhancer in B cells inhibitor, alpha      |
| 1451775_s_at | Il13ra1           | interleukin 13 receptor, alpha 1                                                         |
| 1427844_a_at | Cebpb             | CCAAT/enhancer binding protein (C/EBP), beta                                             |
| 1419610_at   | Ccr1              | chemokine (C-C motif) receptor 1                                                         |
| 1435040_at   | Irak3             | interleukin-1 receptor-associated kinase 3                                               |
| 1425434_a_at | Msr1              | macrophage scavenger receptor 1                                                          |
| 1419209_at   | Cxcl1             | chemokine (C-X-C motif) ligand 1                                                         |
| 1438157_s_at | Nfkbia            | nuclear factor of kappa light polypeptide gene enhancer in B cells inhibitor, alpha      |
| 1421034_a_at | Il4ra             | interleukin 4 receptor, alpha                                                            |
| 1418901_at   | Cebpb             | CCAAT/enhancer binding protein (C/EBP), beta                                             |
| 1417268_at   | Cd14              | CD14 antigen                                                                             |
| 1450446_a_at | Socs1             | suppressor of cytokine signaling 1                                                       |
| 1422062_at   | Msr1              | macrophage scavenger receptor 1                                                          |
| 1416762_at   | S100a10           | S100 calcium binding protein A10 (calpactin)                                             |
| 1456642_x_at | S100a10           | S100 calcium binding protein A10 (calpactin)                                             |
| 1448061_at   | Msr1              | macrophage scavenger receptor 1                                                          |
| 1424302_at   | Lilrb3            | leukocyte immunoglobulin-like receptor, subfamily B (with TM and ITIM domains), member 3 |
| 1417876_at   | Fcgr1             | Fc receptor, IgG, high affinity I                                                        |
| 1420394_s_at | Gp49a :<br>Lilrb4 | glycoprotein 49 A : leukocyte immunoglobulin-like receptor, subfamily B, member 4        |
| 1448929_at   | F13a1             | coagulation factor XIII, A1 subunit                                                      |
| 1421571_a_at | Ly6c1 : Ly6c2     | lymphocyte antigen 6 complex, locus C1 :<br>lymphocyte antigen 6 complex, locus C2       |
| 1419598_at   | Ms4a6d            | membrane-spanning 4-domains, subfamily A, member 6D                                      |
| 1421228_at   | Ccl7              | chemokine (C-C motif) ligand 7                                                           |
| 1455899_x_at | Socs3             | suppressor of cytokine signaling 3                                                       |
| 1420380_at   | Ccl2              | chemokine (C-C motif) ligand 2                                                           |
| 1419599_s_at | Ms4a6d            | membrane-spanning 4-domains, subfamily A, member 6D                                      |
| 1449399_a_at | Il1b              | interleukin 1 beta                                                                       |
| 1457644_s_at | Cxcl1             | chemokine (C-X-C motif) ligand 1                                                         |
| 1419272_at   | Myd88             | myeloid differentiation primary response gene 88                                         |
| 1425435_at   | Msr1              | macrophage scavenger receptor 1                                                          |
| 1420331_at   | Clec4e            | C-type lectin domain family 4, member e                                                  |

| ProbeSet     | GeneSymbol | GeneName                                                                            |
|--------------|------------|-------------------------------------------------------------------------------------|
| 1448306_at   | Nfkbia     | nuclear factor of kappa light polypeptide gene enhancer in B cells inhibitor, alpha |
| 1416576_at   | Socs3      | suppressor of cytokine signaling 3                                                  |
| 1441855_x_at | Cxcl1      | chemokine (C-X-C motif) ligand 1                                                    |
| 1421473_at   | Il1a       | interleukin 1 alpha                                                                 |
| 1419728_at   | Cxcl5      | chemokine (C-X-C motif) ligand 5                                                    |

**Supplementary Table 7 Neutrophil transcriptomic signature**

| ProbeSet     | GeneSymbol | GeneName                                                   |
|--------------|------------|------------------------------------------------------------|
| 1419532_at   | Il1r2      | interleukin 1 receptor, type II                            |
| 1419394_s_at | S100a8     | S100 calcium binding protein A8 (calgranulin A)            |
| 1460282_at   | Trem1      | triggering receptor expressed on myeloid cells 1           |
| 1448291_at   | Mmp9       | matrix metalloproteinase 9                                 |
| 1418806_at   | Csf3r      | colony stimulating factor 3 receptor (granulocyte)         |
| 1448914_a_at | Csf1       | colony stimulating factor 1 (macrophage)                   |
| 1421578_at   | Ccl4       | chemokine (C-C motif) ligand 4                             |
| 1449366_at   | Mmp8       | matrix metalloproteinase 8                                 |
| 1421375_a_at | S100a6     | S100 calcium binding protein A6 (calcyclin)                |
| 1439902_at   | C5ar1      | complement component 5a receptor 1                         |
| 1418847_at   | Arg2       | arginase type II                                           |
| 1417074_at   | Ceacam10   | carcinoembryonic antigen-related cell adhesion molecule 10 |
| 1451054_at   | Orm1       | orosomucoid 1                                              |
| 1419427_at   | Csf3       | colony stimulating factor 3 (granulocyte)                  |
| 1452521_a_at | Plaur      | plasminogen activator, urokinase receptor                  |
| 1448561_at   | Ncf2       | neutrophil cytosolic factor 2                              |
| 1421291_at   | Il18rap    | interleukin 18 receptor accessory protein                  |
| 1460220_a_at | Csf1       | colony stimulating factor 1 (macrophage)                   |
| 1425958_at   | Il1f9      | interleukin 1 family, member 9                             |
| 1420407_at   | Ltb4r1     | leukotriene B4 receptor 1                                  |
| 1448756_at   | S100a9     | S100 calcium binding protein A9 (calgranulin B)            |
| 1450513_at   | Cd33       | CD33 antigen                                               |
| 1421734_at   | Cxcr2      | chemokine (C-X-C motif) receptor 2                         |
| 1418674_at   | Osmr       | oncostatin M receptor                                      |
| 1418722_at   | Ngp        | neutrophilic granule protein                               |
| 1418932_at   | Nfil3      | nuclear factor, interleukin 3, regulated                   |
| 1452016_at   | Alox5ap    | arachidonate 5-lipoxygenase activating protein             |
| 1417256_at   | Mmp13      | matrix metalloproteinase 13                                |
| 1423017_a_at | Il1rn      | interleukin 1 receptor antagonist                          |
| 1420904_at   | Il17ra     | interleukin 17 receptor A                                  |

| ProbeSet     | GeneSymbol                    | GeneName                                                                                       |
|--------------|-------------------------------|------------------------------------------------------------------------------------------------|
| 1447284_at   | Trem1                         | triggering receptor expressed on myeloid cells 1                                               |
| 1416871_at   | Adam8                         | a disintegrin and metallopeptidase domain 8                                                    |
| 1438148_at   | Cxcl3                         | chemokine (C-X-C motif) ligand 3                                                               |
| 1416298_at   | Mmp9                          | matrix metallopeptidase 9                                                                      |
| 1450330_at   | Il10                          | interleukin 10                                                                                 |
| 1425663_at   | Il1rn                         | interleukin 1 receptor antagonist                                                              |
| 1418666_at   | Ptx3                          | pentraxin related gene                                                                         |
| 1438841_s_at | Arg2                          | arginase type II                                                                               |
| 1449984_at   | Cxcl2                         | chemokine (C-X-C motif) ligand 2                                                               |
| 1427747_a_at | Lcn2                          | lipocalin 2                                                                                    |
| 1448573_a_at | Ceacam10                      | carcinoembryonic antigen-related cell adhesion molecule 10                                     |
| 1451798_at   | Il1rn                         | interleukin 1 receptor antagonist                                                              |
| 1424509_at   | Cd177                         | CD177 antigen                                                                                  |
| 1420438_at   | Orm2                          | orosomucoid 2                                                                                  |
| 1448620_at   | Fcgr3                         | Fc receptor, IgG, low affinity III                                                             |
| 1418945_at   | Mmp3                          | matrix metallopeptidase 3                                                                      |
| 1417795_at   | Chl1                          | cell adhesion molecule with homology to L1CAM                                                  |
| 1456545_at   | Il18rap                       | interleukin 18 receptor accessory protein                                                      |
| 1460351_at   | Gm12854 :<br>Gm5068 : S100a11 | predicted gene 12854 : predicted gene 5068 :<br>S100 calcium binding protein A11 (calgizzarin) |
| 1422953_at   | Fpr2                          | formyl peptide receptor 2                                                                      |
| 1438767_at   | Osm                           | oncostatin M                                                                                   |
| 1420905_at   | Il17ra                        | interleukin 17 receptor A                                                                      |
| 1427994_at   | Cd300lf                       | CD300 antigen like family member F                                                             |
| 1420450_at   | Mmp10                         | matrix metallopeptidase 10                                                                     |
| 1460227_at   | Timp1                         | tissue inhibitor of metalloproteinase 1                                                        |
| 1419609_at   | Ccr1                          | chemokine (C-C motif) receptor 1                                                               |

**Supplementary Table 8 B cell transcriptomic signature**

| ProbeSet     | GeneSymbol | GeneName                                           |
|--------------|------------|----------------------------------------------------|
| 1435955_at   | Siglecg    | sialic acid binding Ig-like lectin G               |
| 1416930_at   | Ly6d       | lymphocyte antigen 6 complex, locus D              |
| 1417640_at   | Cd79b      | CD79B antigen                                      |
| 1456632_at   | Bcl11a     | B cell CLL/lymphoma 11A (zinc finger protein)      |
| 1440837_at   | H2-Ob      | histocompatibility 2, O region beta locus          |
| 1419907_s_at | Fcrla      | Fc receptor-like A                                 |
| 1423226_at   | Ms4a1      | membrane-spanning 4-domains, subfamily A, member 1 |
| 1425062_at   | Fcrl1      | Fc receptor-like 1                                 |
| 1455530_at   | Ighv14-2   | immunoglobulin heavy variable 14-2                 |
| 1429889_at   | Faim3      | Fas apoptotic inhibitory molecule 3                |
| 1456328_at   | Bank1      | B cell scaffold protein with ankyrin repeats 1     |

| ProbeSet   | GeneSymbol | GeneName                                           |
|------------|------------|----------------------------------------------------|
| 1419768_at | Cd22       | CD22 antigen                                       |
| 1450912_at | Ms4a1      | membrane-spanning 4-domains, subfamily A, member 1 |
